# Supplementary material for: Employment preferences of healthcare workers in South Africa: Findings from a discrete choice experiment
Source: PubMed Central journal article supplement (PMC8081228; doi:10.1371/journal.pone.0250652), 2021-04-28
Supplement: pone.0250652.s004.pdf [file pone.0250652.s004.pdf]

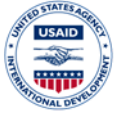

**USAID**  
FROM THE AMERICAN PEOPLE

**HRH**2030  
HUMAN RESOURCES FOR HEALTH IN 2030

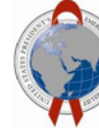

**PEPFAR**  
U.S. President's Emergency Plan for AIDS Relief

# DCE Questionnaire

Version 4

Question 4.1

| OPTION A                                                                            |                                                                                                                                 | OPTION B                                                                             |                                                                                                                               |
|-------------------------------------------------------------------------------------|---------------------------------------------------------------------------------------------------------------------------------|--------------------------------------------------------------------------------------|-------------------------------------------------------------------------------------------------------------------------------|
|     | You have a manageable workload                                                                                                  |    | You have a heavy workload                                                                                                     |
|     | You work in an good culture                                                                                                     |    | You work in a poor culture                                                                                                    |
|    | There is a sufficient availability of equipment and drugs at your work place                                                    |    | There is an insufficient availability of equipment and drugs at your work place                                               |
|    | There are frequent and sufficient opportunities for training, personal development, and continuing education at your work place |   | There are infrequent or minimal opportunities for training, personal development, and continuing education at your work place |
|  | You work at a public clinic                                                                                                     |  | You work at a public hospital                                                                                                 |
|  | In or near a town or city that doesn't require you to relocate                                                                  |  | In or near a town or city that requires you to relocate                                                                       |
|  | You receive a 5% increase on your current salary                                                                                |   | You receive a 10% increase on your current salary                                                                             |
|   | You receive no employee benefits or allowances                                                                                  |   | You receive a medical aid contribution worth 7% of your salary                                                                |

Question 4.2

| OPTION A                                                                            |                                                                                                                               | OPTION B                                                                             |                                                                                                                                 |
|-------------------------------------------------------------------------------------|-------------------------------------------------------------------------------------------------------------------------------|--------------------------------------------------------------------------------------|---------------------------------------------------------------------------------------------------------------------------------|
|     | You have a manageable workload                                                                                                |    | You have a heavy workload                                                                                                       |
|     | You work in an good culture                                                                                                   |    | You work in a poor culture                                                                                                      |
|    | There is a sufficient availability of equipment and drugs at your work place                                                  |    | There is an insufficient availability of equipment and drugs at your work place                                                 |
|   | There are infrequent or minimal opportunities for training, personal development, and continuing education at your work place |   | There are frequent and sufficient opportunities for training, personal development, and continuing education at your work place |
|  | You work at a private clinic                                                                                                  |  | You work at a private hospital                                                                                                  |
|  | In a rural community outside of towns or cities that doesn't require you to relocate                                          |  | In a rural community outside of towns or cities that requires you to relocate                                                   |
|  | You receive a salary cut of 20% from your current salary                                                                      |   | You receive a 5% increase on your current salary                                                                                |
|  | You receive a pension and medical aid contribution worth 20% of your salary                                                   |  | You receive a pension, medical aid contribution, and a living allowance worth 40% of your salary                                |

Question 4.3

| OPTION A                                                                            |                                                                                                                                 | OPTION B                                                                             |                                                                                                                               |
|-------------------------------------------------------------------------------------|---------------------------------------------------------------------------------------------------------------------------------|--------------------------------------------------------------------------------------|-------------------------------------------------------------------------------------------------------------------------------|
|     | You have a manageable workload                                                                                                  |    | You have a heavy workload                                                                                                     |
|     | You work in an good culture                                                                                                     |    | You work in a poor culture                                                                                                    |
|    | There is an insufficient availability of equipment and drugs at your work place                                                 |    | There is a sufficient availability of equipment and drugs at your work place                                                  |
|    | There are frequent and sufficient opportunities for training, personal development, and continuing education at your work place |   | There are infrequent or minimal opportunities for training, personal development, and continuing education at your work place |
|   | You work at a private hospital                                                                                                  |  | You work at a public clinic                                                                                                   |
|  | In a rural community outside of towns or cities that requires you to relocate                                                   |  | In or near a town or city that doesn't require you to relocate                                                                |
|  | You receive a 20% increase on your current salary                                                                               |  | You receive a salary cut of 20% from your current salary                                                                      |
|  | You receive a medical aid contribution worth 7% of your salary                                                                  |  | You receive a pension and medical aid contribution worth 20% of your salary                                                   |

Question 4.4

| OPTION A                                                                            |                                                                                                                               | OPTION B                                                                             |                                                                                                                                 |
|-------------------------------------------------------------------------------------|-------------------------------------------------------------------------------------------------------------------------------|--------------------------------------------------------------------------------------|---------------------------------------------------------------------------------------------------------------------------------|
|    | You have a manageable workload                                                                                                |    | You have a heavy workload                                                                                                       |
|     | You work in a poor culture                                                                                                    |    | You work in an good culture                                                                                                     |
|    | There is a sufficient availability of equipment and drugs at your work place                                                  |    | There is an insufficient availability of equipment and drugs at your work place                                                 |
|   | There are infrequent or minimal opportunities for training, personal development, and continuing education at your work place |   | There are frequent and sufficient opportunities for training, personal development, and continuing education at your work place |
|  | You work at a public clinic                                                                                                   |  | You work at a public hospital                                                                                                   |
|  | In a rural community outside of towns or cities that doesn't require you to relocate                                          |  | In a rural community outside of towns or cities that requires you to relocate                                                   |
|  | You receive a 10% increase on your current salary                                                                             |  | You receive a 20% increase on your current salary                                                                               |
|  | You receive no employee benefits or allowances                                                                                |   | You receive a medical aid contribution worth 7% of your salary                                                                  |

Question 4.5

| OPTION A                                                                            |                                                                                                                                 | OPTION B                                                                             |                                                                                                                               |
|-------------------------------------------------------------------------------------|---------------------------------------------------------------------------------------------------------------------------------|--------------------------------------------------------------------------------------|-------------------------------------------------------------------------------------------------------------------------------|
|     | You have a manageable workload                                                                                                  |    | You have a heavy workload                                                                                                     |
|     | You work in a poor culture                                                                                                      |    | You work in an good culture                                                                                                   |
|    | There is an insufficient availability of equipment and drugs at your work place                                                 |    | There is a sufficient availability of equipment and drugs at your work place                                                  |
|    | There are frequent and sufficient opportunities for training, personal development, and continuing education at your work place |   | There are infrequent or minimal opportunities for training, personal development, and continuing education at your work place |
|   | You work at a public hospital                                                                                                   |   | You work at a private clinic                                                                                                  |
|  | In a rural community outside of towns or cities that requires you to relocate                                                   |  | In or near a town or city that doesn't require you to relocate                                                                |
|  | You receive a 5% increase on your current salary                                                                                |   | You receive a 10% increase on your current salary                                                                             |
|   | You receive a pension, medical aid contribution, and a living allowance worth 40% of your salary                                |  | You receive no employee benefits or allowances                                                                                |

Question 4.6

|                                                                                     | OPTION A                                                                                                                        |                                                                                      | OPTION B                                                                                                                      |
|-------------------------------------------------------------------------------------|---------------------------------------------------------------------------------------------------------------------------------|--------------------------------------------------------------------------------------|-------------------------------------------------------------------------------------------------------------------------------|
|     | You have a heavy workload                                                                                                       |    | You have a manageable workload                                                                                                |
|     | You work in an good culture                                                                                                     |    | You work in a poor culture                                                                                                    |
|    | There is a sufficient availability of equipment and drugs at your work place                                                    |    | There is an insufficient availability of equipment and drugs at your work place                                               |
|    | There are frequent and sufficient opportunities for training, personal development, and continuing education at your work place |   | There are infrequent or minimal opportunities for training, personal development, and continuing education at your work place |
|   | You work at a private hospital                                                                                                  |  | You work at a public clinic                                                                                                   |
|  | In or near a town or city that requires you to relocate                                                                         |  | In a rural community outside of towns or cities that doesn't require you to relocate                                          |
|  | You receive a 5% increase on your current salary                                                                                |   | You receive a 10% increase on your current salary                                                                             |
|   | You receive no employee benefits or allowances                                                                                  |   | You receive a medical aid contribution worth 7% of your salary                                                                |

Question 4.7

|                                                                                     | OPTION A                                                                                                                      |                                                                                      | OPTION B                                                                                                                        |
|-------------------------------------------------------------------------------------|-------------------------------------------------------------------------------------------------------------------------------|--------------------------------------------------------------------------------------|---------------------------------------------------------------------------------------------------------------------------------|
|     | You have a heavy workload                                                                                                     |    | You have a manageable workload                                                                                                  |
|     | You work in an good culture                                                                                                   |    | You work in a poor culture                                                                                                      |
|    | There is an insufficient availability of equipment and drugs at your work place                                               |    | There is a sufficient availability of equipment and drugs at your work place                                                    |
|   | There are infrequent or minimal opportunities for training, personal development, and continuing education at your work place |   | There are frequent and sufficient opportunities for training, personal development, and continuing education at your work place |
|  | You work at a private clinic                                                                                                  |  | You work at a private hospital                                                                                                  |
|  | In or near a town or city that doesn't require you to relocate                                                                |  | In or near a town or city that requires you to relocate                                                                         |
|  | You receive a 10% increase on your current salary                                                                             |  | You receive a 20% increase on your current salary                                                                               |
|   | You receive a pension, medical aid contribution, and a living allowance worth 40% of your salary                              |  | You receive no employee benefits or allowances                                                                                  |



Question 4.8

| OPTION A                                                                            |                                                                                                                                 | OPTION B                                                                             |                                                                                                                               |
|-------------------------------------------------------------------------------------|---------------------------------------------------------------------------------------------------------------------------------|--------------------------------------------------------------------------------------|-------------------------------------------------------------------------------------------------------------------------------|
|     | You have a manageable workload                                                                                                  |    | You have a heavy workload                                                                                                     |
|     | You work in an good culture                                                                                                     |    | You work in a poor culture                                                                                                    |
|    | There is a sufficient availability of equipment and drugs at your work place                                                    |    | There is an insufficient availability of equipment and drugs at your work place                                               |
|    | There are frequent and sufficient opportunities for training, personal development, and continuing education at your work place |   | There are infrequent or minimal opportunities for training, personal development, and continuing education at your work place |
|  | You work at a public clinic                                                                                                     |  | You work at a public hospital                                                                                                 |
|  | In or near a town or city that doesn't require you to relocate                                                                  |  | In or near a town or city that requires you to relocate                                                                       |
|  | You receive a 5% increase on your current salary                                                                                |   | You receive a 10% increase on your current salary                                                                             |
|  | You receive no employee benefits or allowances                                                                                  |   | You receive a medical aid contribution worth 7% of your salary                                                                |

Question 4.9

|                                                                                     | OPTION A                                                                                                                        |                                                                                      | OPTION B                                                                                                                      |
|-------------------------------------------------------------------------------------|---------------------------------------------------------------------------------------------------------------------------------|--------------------------------------------------------------------------------------|-------------------------------------------------------------------------------------------------------------------------------|
|     | You have a heavy workload                                                                                                       |    | You have a manageable workload                                                                                                |
|     | You work in a poor culture                                                                                                      |    | You work in an good culture                                                                                                   |
|    | There is a sufficient availability of equipment and drugs at your work place                                                    |    | There is an insufficient availability of equipment and drugs at your work place                                               |
|    | There are frequent and sufficient opportunities for training, personal development, and continuing education at your work place |   | There are infrequent or minimal opportunities for training, personal development, and continuing education at your work place |
|   | You work at a public hospital                                                                                                   |   | You work at a private clinic                                                                                                  |
|  | In or near a town or city that requires you to relocate                                                                         |  | In a rural community outside of towns or cities that doesn't require you to relocate                                          |
|  | You receive a 20% increase on your current salary                                                                               |  | You receive a salary cut of 20% from your current salary                                                                      |
|  | You receive a pension and medical aid contribution worth 20% of your salary                                                     |  | You receive a pension, medical aid contribution, and a living allowance worth 40% of your salary                              |

Question 4.10

| OPTION A                                                                            |                                                                                                                               | OPTION B                                                                             |                                                                                                                                 |
|-------------------------------------------------------------------------------------|-------------------------------------------------------------------------------------------------------------------------------|--------------------------------------------------------------------------------------|---------------------------------------------------------------------------------------------------------------------------------|
|     | You have a heavy workload                                                                                                     |    | You have a manageable workload                                                                                                  |
|     | You work in a poor culture                                                                                                    |    | You work in an good culture                                                                                                     |
|    | There is an insufficient availability of equipment and drugs at your work place                                               |    | There is a sufficient availability of equipment and drugs at your work place                                                    |
|   | There are infrequent or minimal opportunities for training, personal development, and continuing education at your work place |   | There are frequent and sufficient opportunities for training, personal development, and continuing education at your work place |
|  | You work at a public clinic                                                                                                   |  | You work at a public hospital                                                                                                   |
|  | In or near a town or city that doesn't require you to relocate                                                                |  | In or near a town or city that requires you to relocate                                                                         |
|  | You receive a salary cut of 20% from your current salary                                                                      |   | You receive a 5% increase on your current salary                                                                                |
|  | You receive a medical aid contribution worth 7% of your salary                                                                |  | You receive a pension and medical aid contribution worth 20% of your salary                                                     |
